# Supplementary material for: Designing a green-emitting viscosity-sensitive 4,4-difluoro-4-bora-3a,4a-diaza-s-indacene (BODIPY) probe for plasma membrane viscosity imaging
Source: Royal Society of Chemistry journal article supplement (doi:10.1039/d3ra04126c), 2023-01-01
Supplement: d3ra04126c1.pdf [file d3ra04126c1.pdf]

*Supporting Information for:*

**Designing a Green-Emitting Viscosity-Sensitive 4,4-difluoro-4-bora-3a,4a-diaza-s-indacene (BODIPY) Probe for Plasma Membrane Viscosity Imaging**

Artūras Polita,<sup>a</sup> Milda Stancikaitė,<sup>b</sup> Rokas Žvirblis,<sup>c</sup> Karolina Maleckaitė,<sup>b</sup> Jelena Dodonova-Vaitkūnienė,<sup>d</sup> Sigitas Tumkevičius,<sup>d</sup> Arun Prabha Shivabalan<sup>a</sup> and Gintaras Valinčius<sup>a</sup>

<sup>a</sup> Life Sciences Center, Institute of Biochemistry, Vilnius University, Saulėtekio av. 7, Vilnius, LT-10257, Lithuania. E-mail: arturas.polita@gmc.vu.lt.

<sup>b</sup> Center of Physical Sciences and Technology, Saulėtekio av. 3, Vilnius, LT-10257, Lithuania.

<sup>c</sup> Life Sciences Center, Institute of Biotechnology, Vilnius University, Saulėtekio av. 7, Vilnius, LT-10257, Lithuania.

<sup>d</sup> Institute of Chemistry, Faculty of Chemistry and Geosciences, Vilnius University, Naugarduko st. 24, Vilnius, LT-03225, Lithuania.

Table of Contents

|                   |                                                                                                                                                                               |
|-------------------|-------------------------------------------------------------------------------------------------------------------------------------------------------------------------------|
| <b>Table S1</b>   | Precise biexponential intensity-weighted fluorescence lifetimes of BODIPY-PM in toluene-castor oil mixtures at room temperature.                                              |
| <b>Table S2</b>   | Precise fluorescence lifetimes of BODIPY-PM in water-glycerol mixtures at room temperature.                                                                                   |
| <b>Table S3</b>   | Precise fluorescence lifetimes of BODIPY-PM in methanol-glycerol mixtures at room temperature.                                                                                |
| <b>Figure S1</b>  | BODIPY-PM absorption, steady-state and time-resolved fluorescence spectra in cyclohexane, toluene, methanol and glycerol.                                                     |
| <b>Figure S2</b>  | BODIPY-PM absorption, steady-state and time-resolved fluorescence spectra in toluene-castor oil mixtures.                                                                     |
| <b>Figure S3</b>  | Biexponential intensity-weighted fluorescence lifetimes of BODIPY-PM in toluene-castor oil mixtures, starting from toluene-castor oil 20% and finishing with pure castor oil. |
| <b>Figure S4</b>  | BODIPY-PM absorption, steady-state and time-resolved fluorescence spectra in water-glycerol mixtures.                                                                         |
| <b>Figure S5</b>  | Fluorescence lifetimes of BODIPY-PM in water-glycerol mixtures, starting from pure water and finishing with pure glycerol.                                                    |
| <b>Figure S6</b>  | BODIPY-PM absorption, steady-state and time-resolved fluorescence spectra in methanol-glycerol mixtures.                                                                      |
| <b>Figure S7</b>  | Fluorescence lifetimes of BODIPY-PM in methanol-glycerol mixtures, starting from pure methanol and finishing with pure glycerol.                                              |
| <b>Figure S8</b>  | Time-resolved fluorescence decays of BODIPY-PM in different lipid order LUVs.                                                                                                 |
| <b>Figure S9</b>  | Steady-state and time-resolved fluorescence decays of BODIPY-PM in LUVs with different NaI quencher concentrations.                                                           |
| <b>Figure S10</b> | Birghtfiled microscopy of lung cancer cells stained with BODIPY-PM.                                                                                                           |
| <b>Figure S11</b> | Synthesis of BODIPY-PM.                                                                                                                                                       |
| <b>Figure S12</b> | <sup>1</sup> H NMR spectrum of BODIPY-PM.                                                                                                                                     |
| <b>Figure S13</b> | <sup>13</sup> C NMR spectrum of BODIPY-PM.                                                                                                                                    |
| <b>Figure S14</b> | <sup>19</sup> F NMR spectrum of BODIPY-PM.                                                                                                                                    |
| <b>Figure S15</b> | <sup>11</sup> B NMR spectrum of BODIPY-PM.                                                                                                                                    |
| <b>Figure S16</b> | Mass spectrum of BODIPY-PM.                                                                                                                                                   |

BODIPY-PM absorption, steady-state and time-resolved fluorescence spectra in cyclohexane, toluene, methanol and glycerol

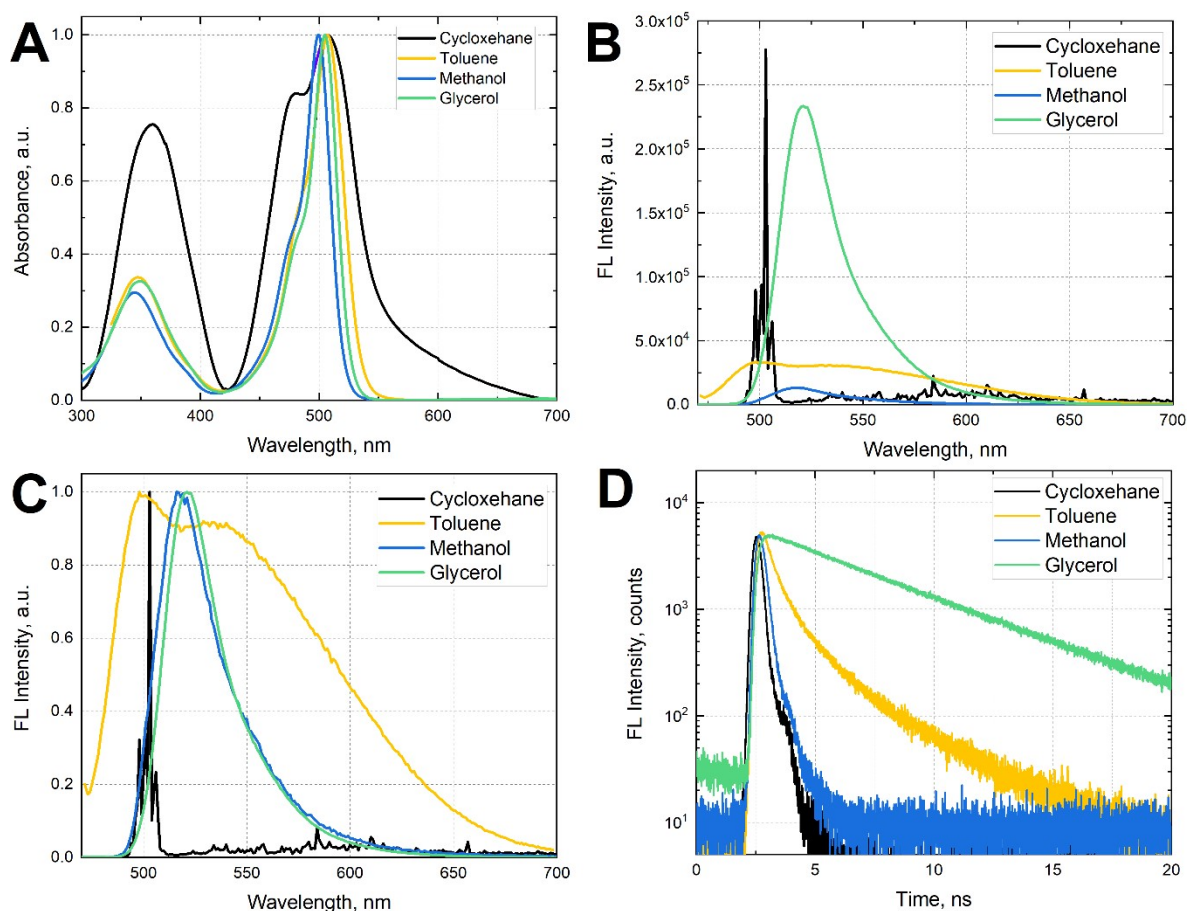

**Figure S1.** (A) Absorption spectrum of BODIPY-PM in cyclohexane, toluene, methanol and glycerol. (B) Relative steady-state fluorescence spectra of BODIPY-PM in cyclohexane, toluene, methanol and glycerol. (C) Normalized steady-state fluorescence spectra of BODIPY-PM in cyclohexane, toluene, methanol and glycerol. (D) Time-resolved fluorescence decays of BODIPY-PM in cyclohexane, toluene, methanol and glycerol.

BODIPY-PM is not completely dissolved in very non-polar solvents, such as cyclohexane and toluene and additional red bands appear in the steady-state fluorescence spectra, indicating characteristic BODIPY aggregation (Fig. S1). In addition, the fluorescence decays of BODIPY-PM in cyclohexane and toluene become longer and biexponential, in contrast to monoexponential decays in methanol, water or DMSO.

## BODIPY-PM absorption, steady-state and time-resolved fluorescence spectra in toluene-castor oil mixtures

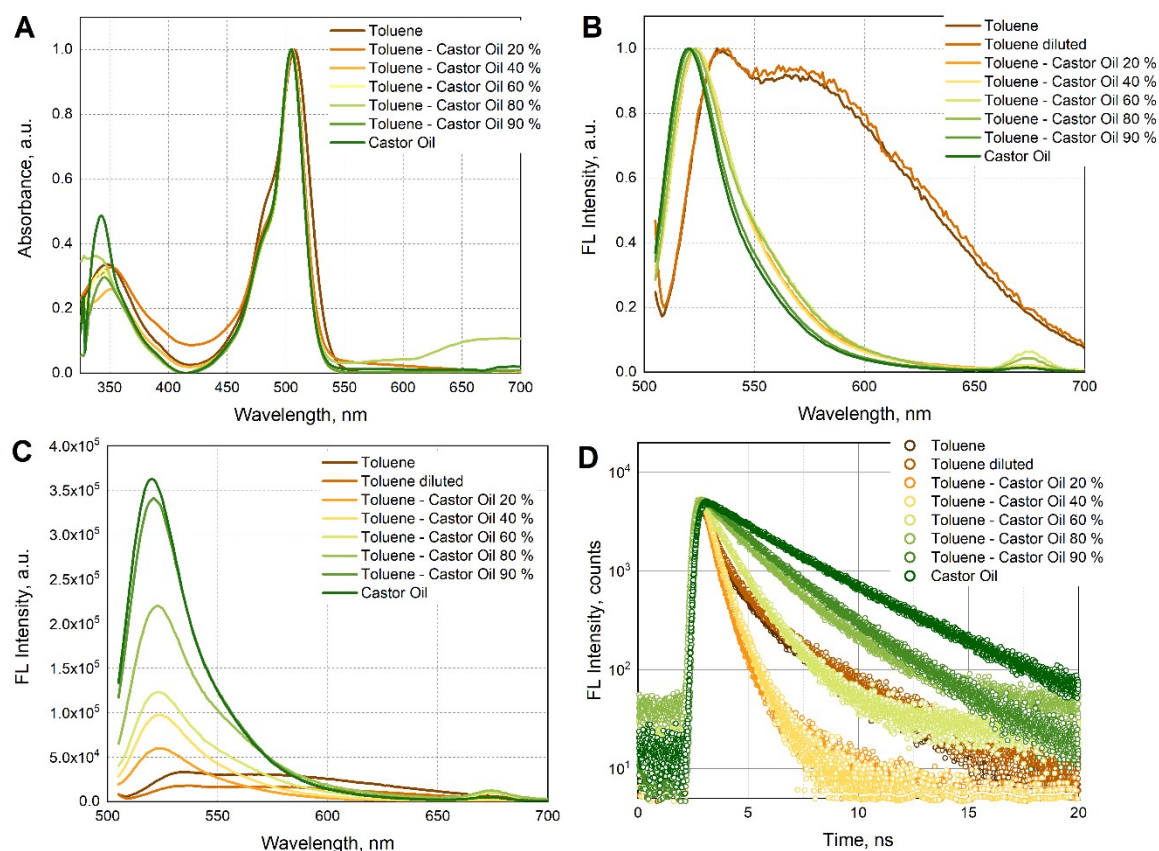

**Figure S2.** (A) Absorption spectra of BODIPY-PM dissolved in toluene-castor oil mixtures. (B) Normalized steady-state fluorescence spectra of BODIPY-PM in toluene-castor oil mixtures. (C) Relative steady-state fluorescence spectra of BODIPY-PM in toluene-castor oil mixtures. (D) Time-resolved fluorescence decays of BODIPY-PM in toluene-castor oil mixtures.

BODIPY-PM was dissolved at 1  $\mu\text{M}$  concentration in pure toluene and toluene-castor oil mixtures. As evident from the steady-state fluorescence spectra, BODIPY-PM is not fully solvated in pure toluene and characteristic red band appears, indicating dye aggregation (Fig. S2, B). Even upon further dye dilution at 0.5  $\mu\text{M}$  concentration, the dye still remains undissolved (Fig. S2, B, Toluene diluted). Upon BODIPY-PM aggregation, fluorescence lifetimes increase to about 500 ps (Fig. S2, D). Finally, BODIPY-PM fluorescence intensity (Fig. S2, C) and fluorescence lifetimes increase with increase in viscosity of toluene-castor oil mixtures. Precise toluene-castor oil viscosity values and the fluorescence lifetimes of BODIPY-PM in these mixtures are presented in the Table S1 and Figure S3. As BODIPY-PM aggregates in the pure toluene, only the mixtures from toluene-castor oil 20% to pure castor oil were used for the fluorescence lifetime calibration. The fluorescence decays in toluene-castor oil mixtures were biexponential and intensity-weighted lifetimes were calculated.

| Viscosity, cP | Intensity-weighted fluorescence lifetime $\tau$ , ps | Composition            |
|---------------|------------------------------------------------------|------------------------|
| 1.21          | 490                                                  | Toluene-Castor oil 20% |
| 4.86          | 737                                                  | Toluene-Castor oil 40% |
| 20.18         | 1316                                                 | Toluene-Castor oil 60% |
| 104.46        | 2234                                                 | Toluene-Castor oil 80% |
| 304.265       | 2708                                                 | Toluene-Castor oil 90% |
| 919.19        | 3725                                                 | Castor oil             |

**Table S1.** Precise biexponential intensity-weighted fluorescence lifetimes of BODIPY-PM in toluene-castor oil mixtures at room temperature.

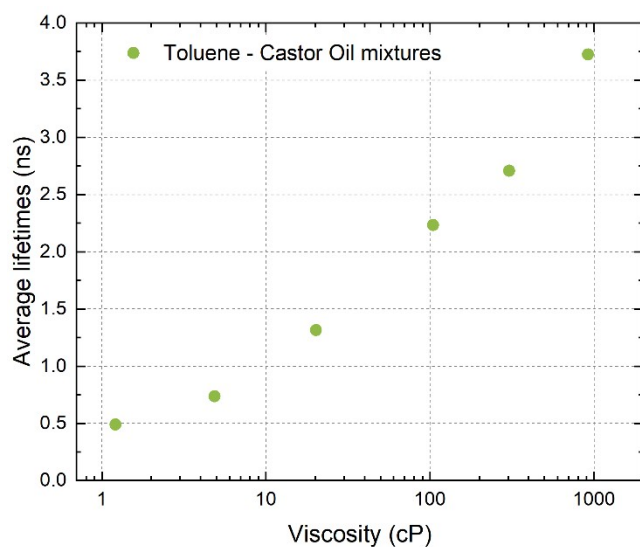

**Figure S3.** Biexponential intensity-weighted fluorescence lifetimes of BODIPY-PM in toluene-castor oil mixtures, starting from toluene-castor oil 20% and finishing with pure castor oil.

#### BODIPY-PM absorption, steady-state and time-resolved fluorescence spectra in water-glycerol mixtures

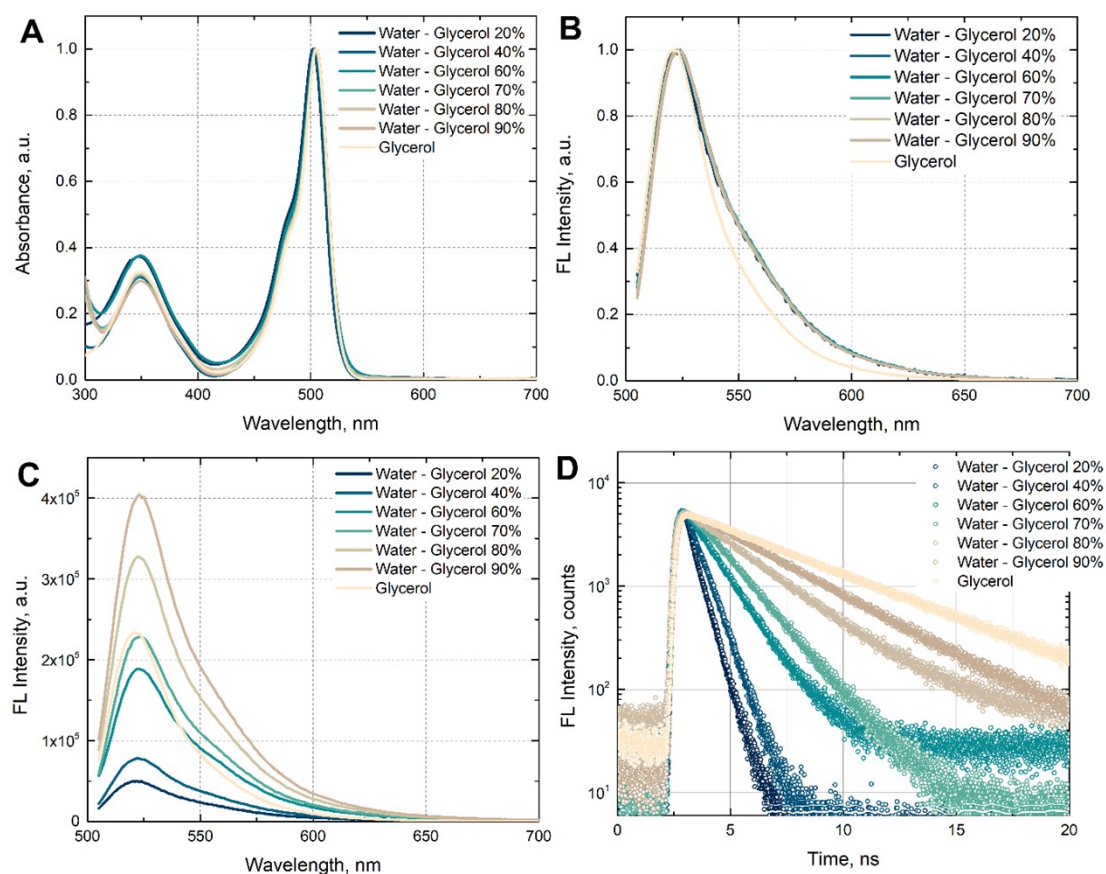

**Figure S4.** (A) Absorption spectra of BODIPY-PM dissolved in water-glycerol mixtures. (B) Normalized steady-state fluorescence spectra of BODIPY-PM in water-glycerol mixtures. (C) Relative steady-state fluorescence spectra of BODIPY-PM in water-glycerol mixtures. (D) Time-resolved fluorescence decays of BODIPY-PM in water-glycerol mixtures.

BODIPY-PM was dissolved at 1  $\mu\text{M}$  concentration water-glycerol mixtures, starting from pure water and ending up with pure glycerol. Water-glycerol mixtures fully solvate BODIPY-PM and fluorescence intensity along with fluorescence lifetimes increase with increase in viscosity of the mixture (Fig. S4, C, D). The fluorescence decays become biexponential upon reaching water-glycerol 60% composition and remain biexponential even in pure glycerol mixtures. Intensity-weighted fluorescence lifetimes were calculated for the biexponential decays. Precise water-glycerol viscosity values and the fluorescence lifetimes of BODIPY-PM in these mixtures are given in the Table S2 and Figure S5.

| Viscosity, cP | Intensity-weighted fluorescence lifetime $\tau$ , ps | Composition        |
|---------------|------------------------------------------------------|--------------------|
| 1             | 264                                                  | Water              |
| 1.76          | 437                                                  | Water-Glycerol 20% |
| 3.72          | 630                                                  | Water-Glycerol 40% |
| 10.8          | 1272                                                 | Water-Glycerol 60% |
| 22.5          | 1666                                                 | Water-Glycerol 70% |
| 60.1          | 2699                                                 | Water-Glycerol 80% |
| 219           | 3643                                                 | Water-Glycerol 90% |
| 930           | 5127                                                 | Glycerol           |

**Table S2.** Precise fluorescence lifetimes of BODIPY-PM in water-glycerol mixtures at room temperature.

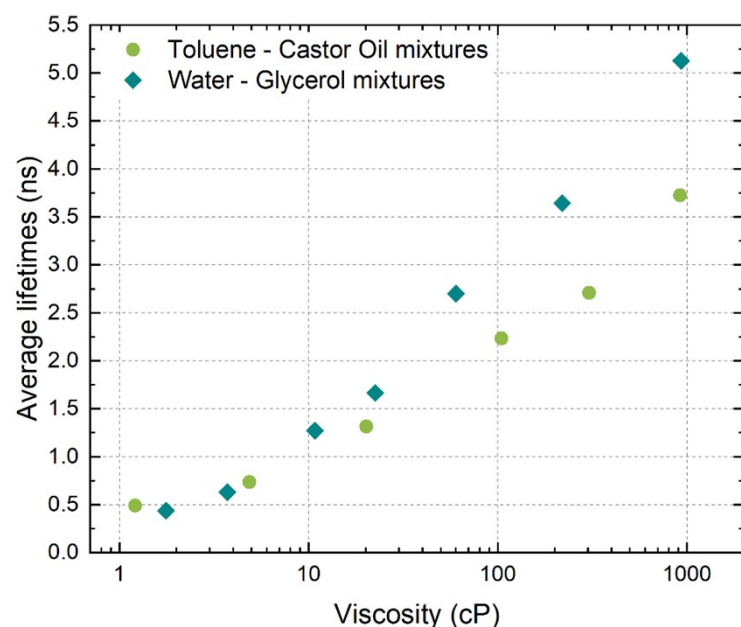

**Figure S5.** Fluorescence lifetimes of BODIPY-PM in water-glycerol mixtures (blue), starting from pure water and finishing with pure glycerol. Fluorescence lifetimes of BODIPY-PM in toluene-castor oil mixtures (green) are added for comparison.

## BODIPY-PM absorption, steady-state and time-resolved fluorescence spectra in methanol-glycerol mixtures

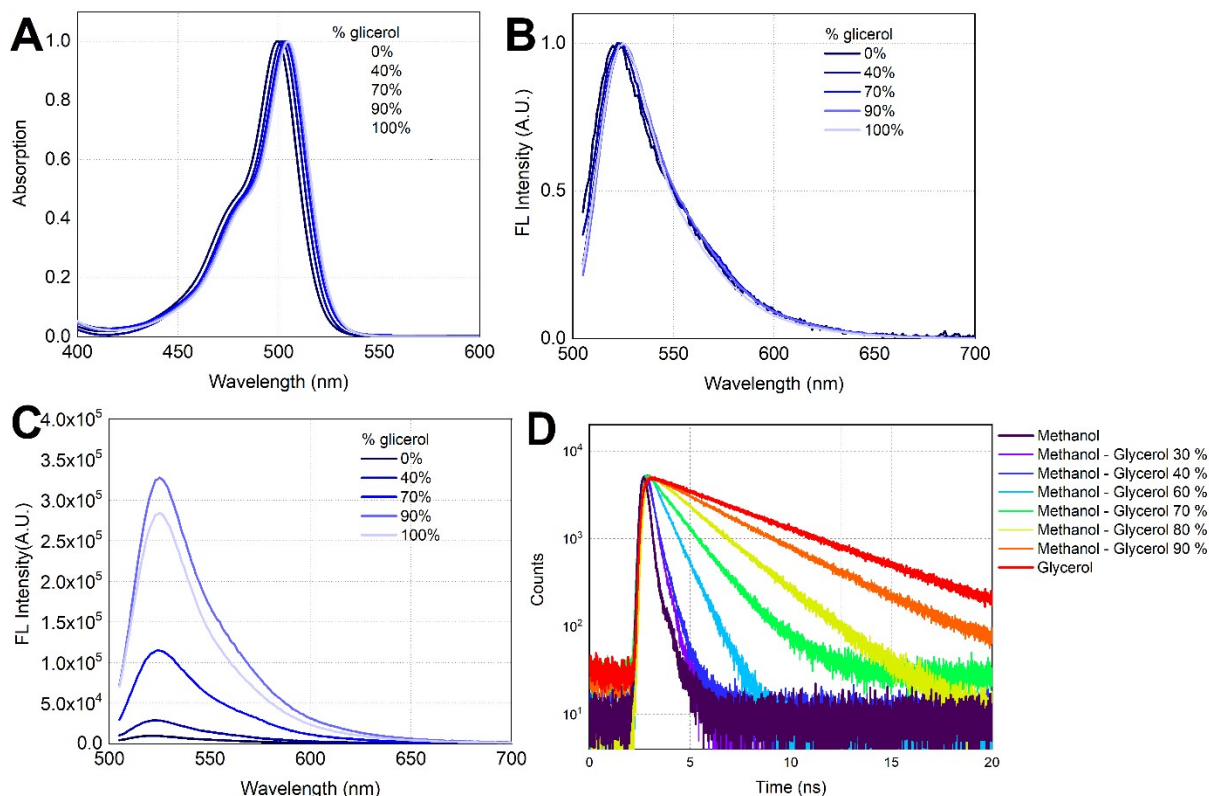

**Figure S6.** (A) Absorption spectra of BODIPY-PM dissolved in methanol-glycerol mixtures. (B) Normalized steady-state fluorescence spectra of BODIPY-PM in methanol-glycerol mixtures. (C) Relative steady-state fluorescence spectra of BODIPY-PM in methanol-glycerol mixtures. (D) Time-resolved fluorescence decays of BODIPY-PM in methanol-glycerol mixtures.

BODIPY-PM was dissolved at 1  $\mu\text{M}$  concentration methanol-glycerol mixtures, starting from pure methanol and ending up with pure glycerol. Methanol-glycerol mixtures readily dissolve BODIPY-PM and fluorescence intensities with fluorescence lifetimes increase with increase in viscosity of the mixture (Fig. S6). The fluorescence decays become biexponential upon reaching methanol-glycerol 60% composition and remain biexponential even in pure glycerol mixtures. Intensity-weighted fluorescence lifetimes were calculated for biexponential decays. Precise methanol-glycerol viscosity values and the fluorescence lifetimes of BODIPY-PM in these mixtures are given in the Table S3 and Figure S7.

| Viscosity, cP | Intensity-weighted fluorescence lifetime $\tau$ , ps | Composition           |
|---------------|------------------------------------------------------|-----------------------|
| 0.62          | 122                                                  | Methanol              |
| 2.913         | 245                                                  | Methanol-Glycerol 30% |
| 5.418         | 321                                                  | Methanol-Glycerol 40% |
| 23.886        | 785                                                  | Methanol-Glycerol 60% |
| 54.176        | 1497                                                 | Methanol-Glycerol 70% |
| 129.835       | 2226                                                 | Methanol-Glycerol 80% |
| 345.33        | 3662                                                 | Methanol-Glycerol 90% |
| 930           | 5127                                                 | Glycerol              |

**Table S3.** Precise fluorescence lifetimes of BODIPY-PM in methanol-glycerol mixtures at room temperature.

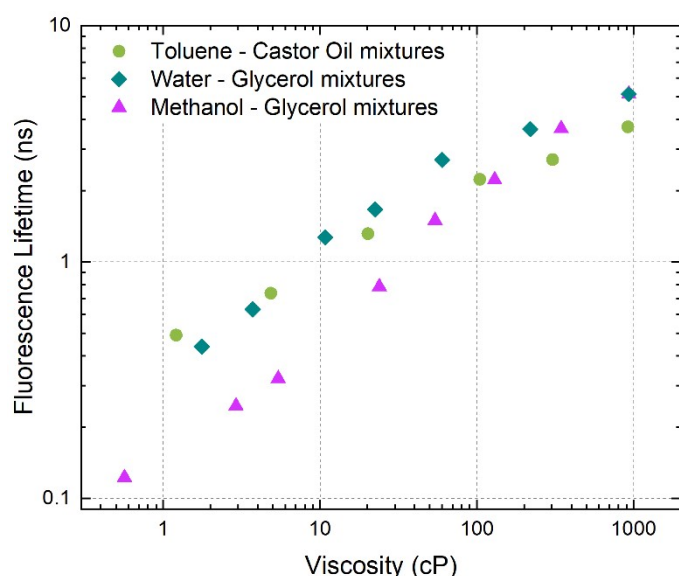

**Figure S7.** Fluorescence lifetimes of BODIPY-PM in methanol-glycerol mixtures (magenta), starting from pure methanol and finishing with pure glycerol. Fluorescence lifetimes of BODIPY-PM in toluene-castor oil mixtures (green) and water-glycerol mixtures (blue) are added for comparison.

BODIPY-PM steady-state and time-resolved fluorescence spectra in Ld POPC, Lo DOPC/DPPC/Chol and Lo DOPC/BSM/Chol, and gel-phase DMPC and DPPC LUVs

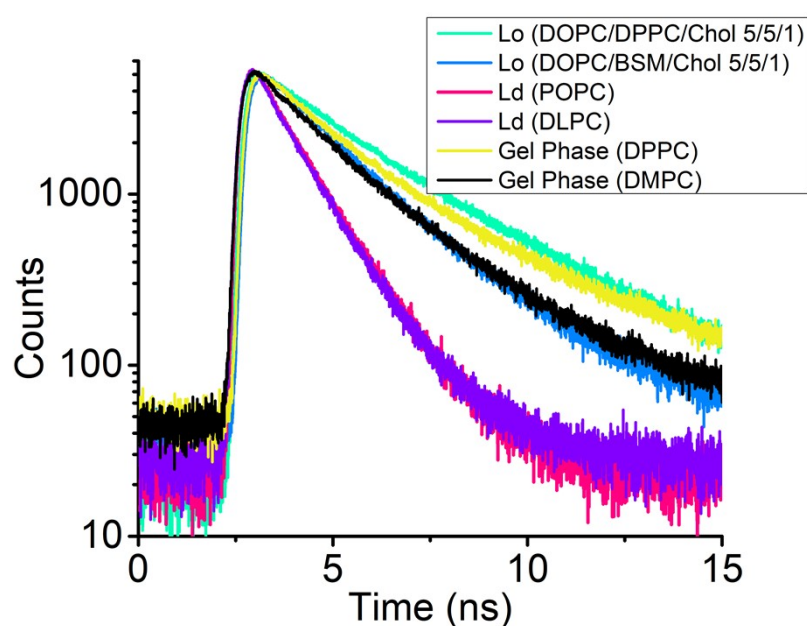

**Figure S8.** Time-resolved fluorescence decays of BODIPY-PM in different lipid order LUVs.

LUVs with 100nm diameter were prepared with different lipid order compositions, ranging from Ld (POPC, DLPC), to Lo (DOPC/DPPC/Chol and DOPC/BSM/Chol), to gel-phase LUVs (DPPC and DMPC). BODIPY-PM to lipid ratio in LUVs was 1:600. In the gel-phase LUVs, fluorescence decays were shorter compared to the Lo phases, even though the lipid packaging density is higher in the gel-phase and the viscosity values in gel-phase should significantly surpass Lo phase. We hypothesized that BODIPY-PM is partially exposed to the aqueous solution in the gel-phase bilayers and is unable to measure correct viscosity values. To test this hypothesis we performed quenching experiments of Ld (POPC) and gel-phase (DMPC and DPPC) LUVs with NaI (Fig. S9).

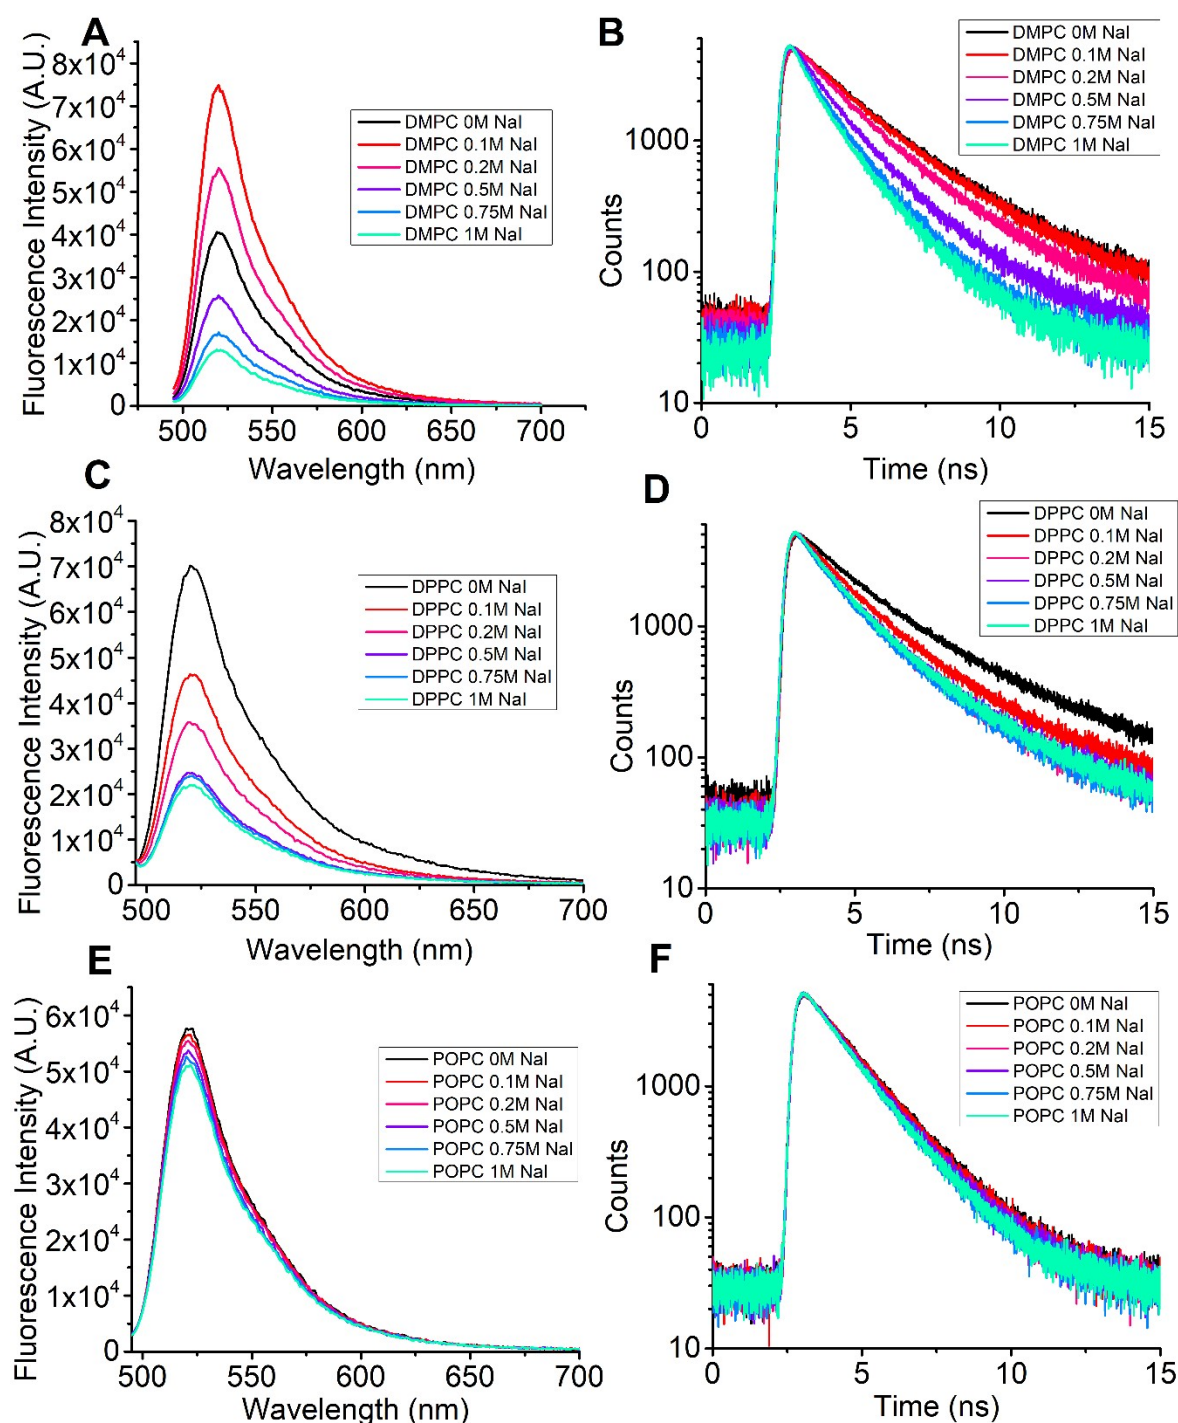

**Figure S9.** Steady-state and time-resolved fluorescence decays of BODIPY-PM in LUVs with different NaI quencher concentrations. (A,B) Gel-phase DMPC LUVs. (C,D) Gel-phase DPPC LUVs. (E,F) Ld POPC LUVs.

LUVs with 100nm diameter were prepared with gel-phase (DPPC and DMPC) and Ld (POPC) compositions. BODIPY-PM to lipid ratio in LUVs was 1:600. Increase in NaI concentration almost unaffected fluorescence decays and intensities of Ld POPC LUVs (Fig. S9 E,F). On the other hand, fluorescence decays and intensities were significantly reduced in gel-phase DMPC and DPPC LUVs (Fig. S9). This result indicates, that BODIPY-PM is deeply buried in the fluid-phase bilayer and iodide ions are not able to access the probe, whereas in the gel-phase bilayer the BODIPY-PM is exposed to iodide ions and is easily quenched.

### Birghtfiled microscopy of lung cancer cells stained with BODIPY-PM

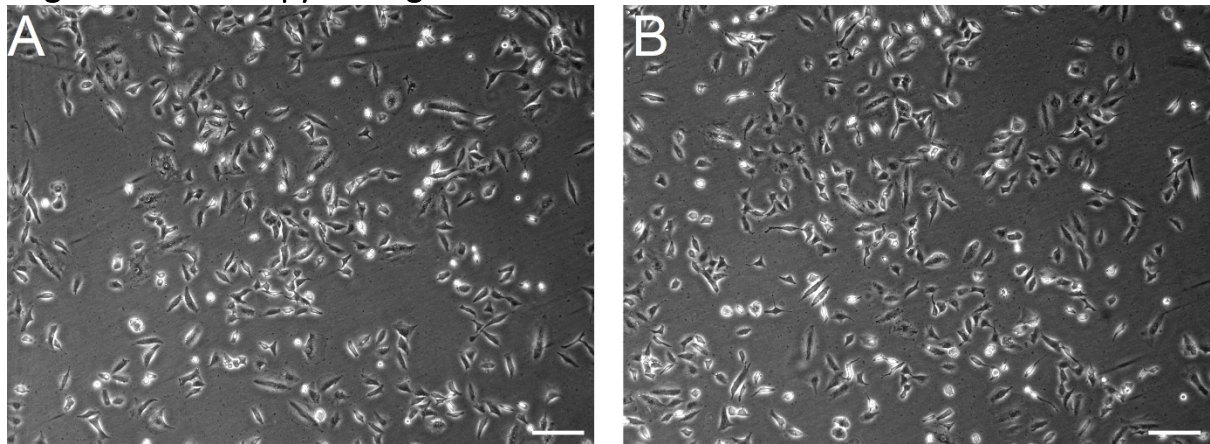

**Figure S10.** (A) Brightfield image of A549 human lung cancer cells before addition of BODIPY-PM, the cells display normal morphology, scale bar is 200  $\mu\text{m}$ . (B) Brightfield image of A549 human lung cancer cells, stained with BODIPY-PM, after FLIM experiments. The cells show normal cancer cell morphology.

Lung cancer cells (A549) display normal cell morphology after being stained with 1  $\mu\text{M}$  concentration of BODIPY-PM in aqueous solution. We suppose, that BODIPY-PM is non-toxic to the cells at 1  $\mu\text{M}$  concentrations, which are sufficient to stain the cells. In addition, FLIM experiments did not change the morphology of the cells (Fig. S10).

## Synthesis of BODIPY-PM and spectral identification

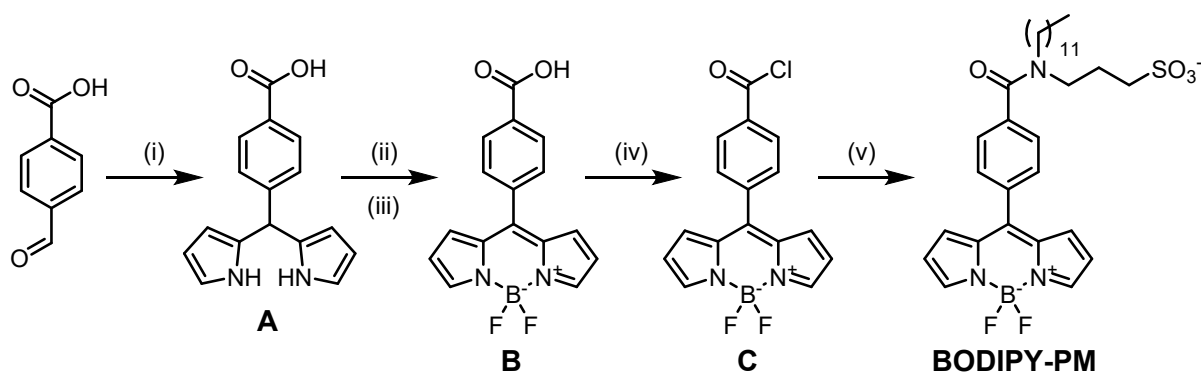

**Figure S11. Reagents and conditions:** (i) 10 eq. of neat pyrrole, 0.1 M HCl,  $\text{CH}_2\text{Cl}_2$ , argon, r.t., 24 h; (ii) 1.5 eq. DDQ,  $\text{CH}_2\text{Cl}_2$ , and then (iii) 7 eq.  $\text{BF}_3(\text{OEt}_2)_2$  and 7 eq.  $\text{Et}_3\text{N}$ ,  $\text{CH}_2\text{Cl}_2$ , argon,  $0^\circ \rightarrow \text{r.t.}$ , darkness, 24 h; (iv) 2 eq. oxalyl chloride, 4 eq.  $\text{K}_2\text{CO}_3$ , drop of DMF,  $\text{CH}_2\text{Cl}_2$ , argon, r.t., 45 min; (v) 1.33 eq. 3-(dodecylammonio)propane-1-sulfonate, 1.33 eq. DIPEA,  $\text{CH}_2\text{Cl}_2$ , argon, r.t., 24 h.

Compounds **A**, **B** [1] and **C** [2] as well as 3-(dodecylammonio)propane-1-sulfonate [3] were prepared according to previously published procedures.

**BODIPY-PM.** Compound **C** (50 mg, 0.151 mmol) and 1.33 eq. of 3-(dodecylammonio)propane-1-sulfonate (61.8 mg, 0.202 mmol) were dissolved in 2 mL of  $\text{CH}_2\text{Cl}_2$  and 1.33 eq. of DIPEA (35.2  $\mu\text{L}$ , 2.49 mmol) was added. The mixture was degassed with argon and stirred for 24 hours at room temperature. The reaction progress was controlled using thin-layer chromatography. After the reaction was complete, the solvent was removed under reduced pressure and the crude product was purified by column chromatography on silica gel (eluent –  $\text{CHCl}_3:\text{MeOH}$  (9:1)).

**BODIPY-PM.** Orange-sticky solid, yield 86 mg (96%), mp 155-156  $^\circ\text{C}$ ,  $^1\text{H NMR}$  (400 MHz,  $\text{CDCl}_3$ ):  $\delta$  (ppm) = 7.93 (s, 2H); 7.51 (m, 4H); 6.81 (m, 2H); 6.50 (d,  $J = 4$  Hz, 2H); 3.83-3.51 (m, 2H); 3.23-3.11 (m, 2H); 2.26-2.04 (m, 2H); 1.30-1.00 (m, 22H); 0.86 (t,  $J = 8$  Hz, 3H).  $^{13}\text{C NMR}$  (100 MHz,  $\text{CDCl}_3$ ):  $\delta$  (ppm) = 170.8; 145.8; 144.6; 138.6; 134.7; 134.6; 131.4; 130.5; 126.9; 118.9; 54.1; 50.6; 42.4; 31.9; 29.6; 29.6; 29.55; 29.3; 29.1; 28.7; 26.5; 22.6; 18.6; 17.4; 14.1.  $^{11}\text{B NMR}$  (128.4 MHz,  $\text{CDCl}_3$ ):  $\delta$  (ppm) = 0.20 (t,  $J_{\text{B-F}} = 28.2$  Hz).  $^{19}\text{F NMR}$  (376.5 MHz,  $\text{CDCl}_3$ ):  $\delta$  (ppm) = -144.86 (dd,  $J_{\text{F-F}} = 56.5$  Hz,  $J_{\text{F-B}} = 30.12$  Hz). **HRMS** (ESI-TOF)  $m/z$  602.3036 ( $\text{C}_{31}\text{H}_{43}\text{BF}_2\text{N}_3\text{O}_4\text{S}^+ [\text{M}+2\text{H}]^+$ , requires 602.3029).

## NMR spectra

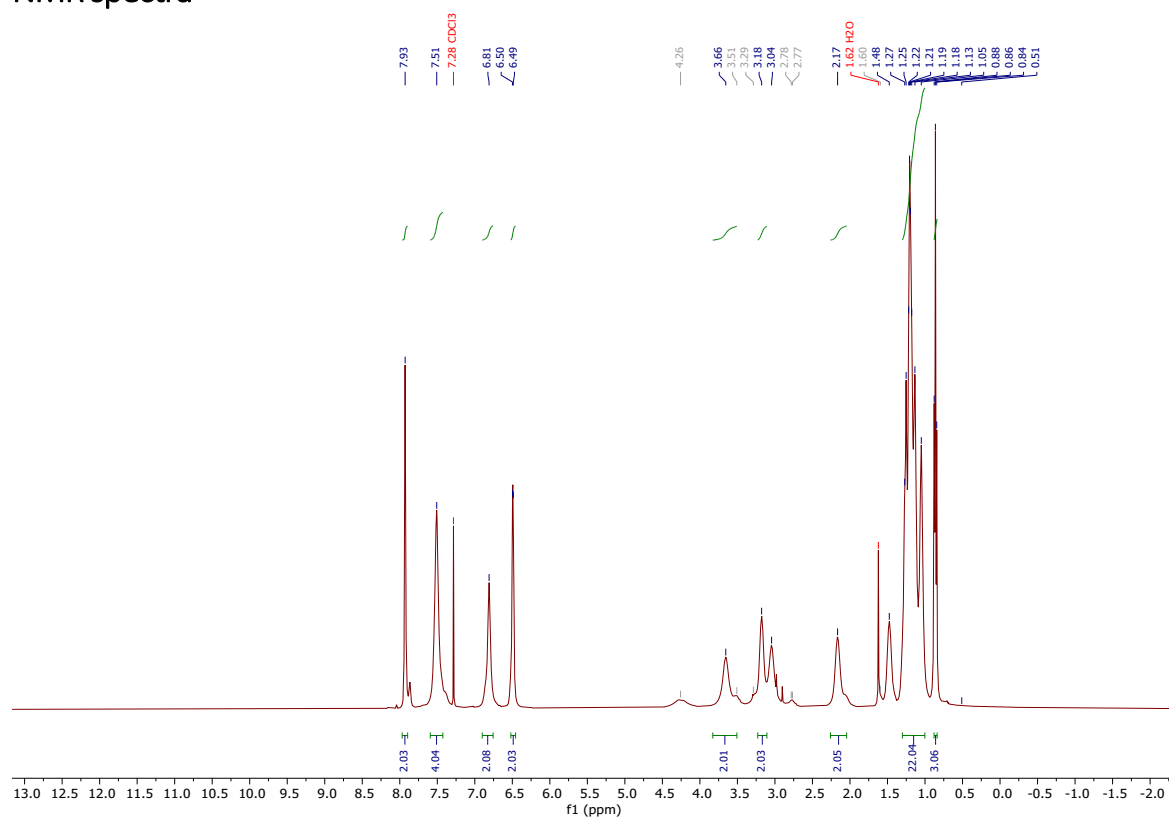

Fig S12. <sup>1</sup>H NMR spectrum of BODIPY-PM.

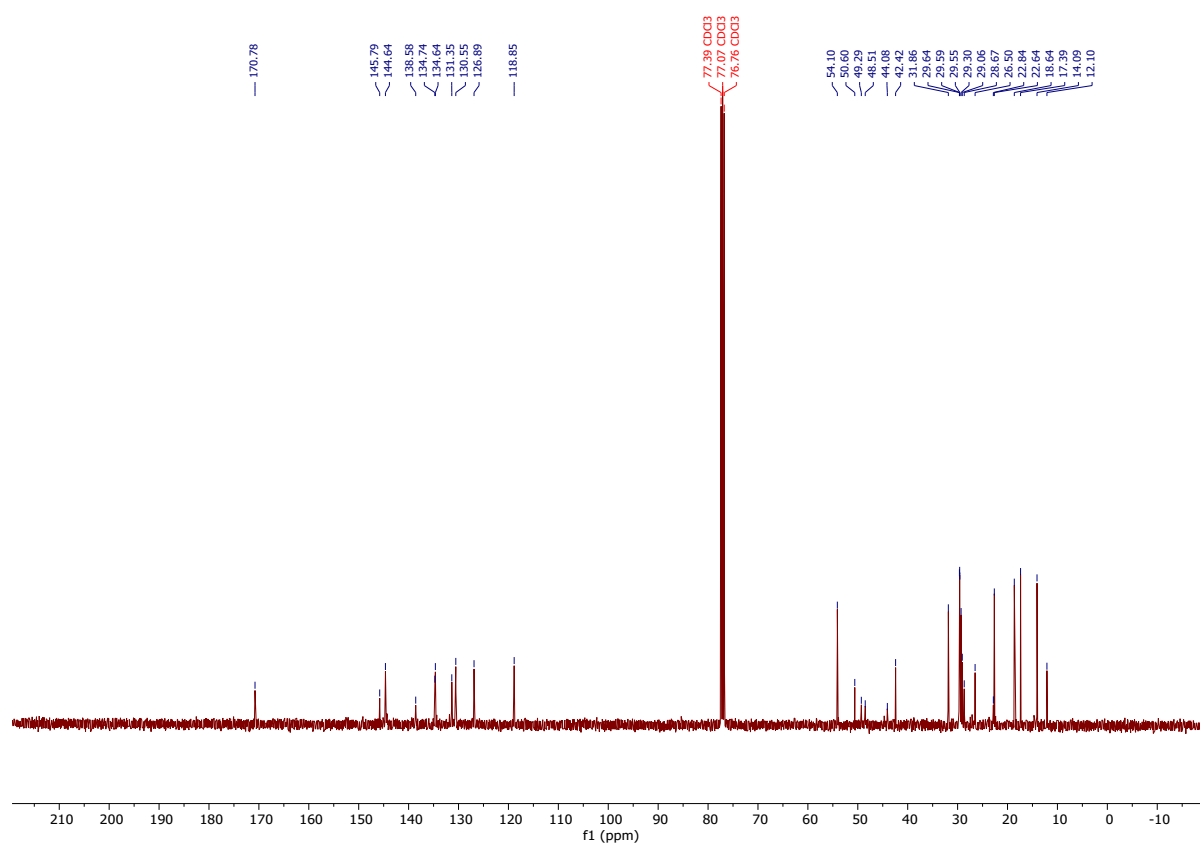

Fig S13. <sup>13</sup>C NMR spectrum of BODIPY-PM.

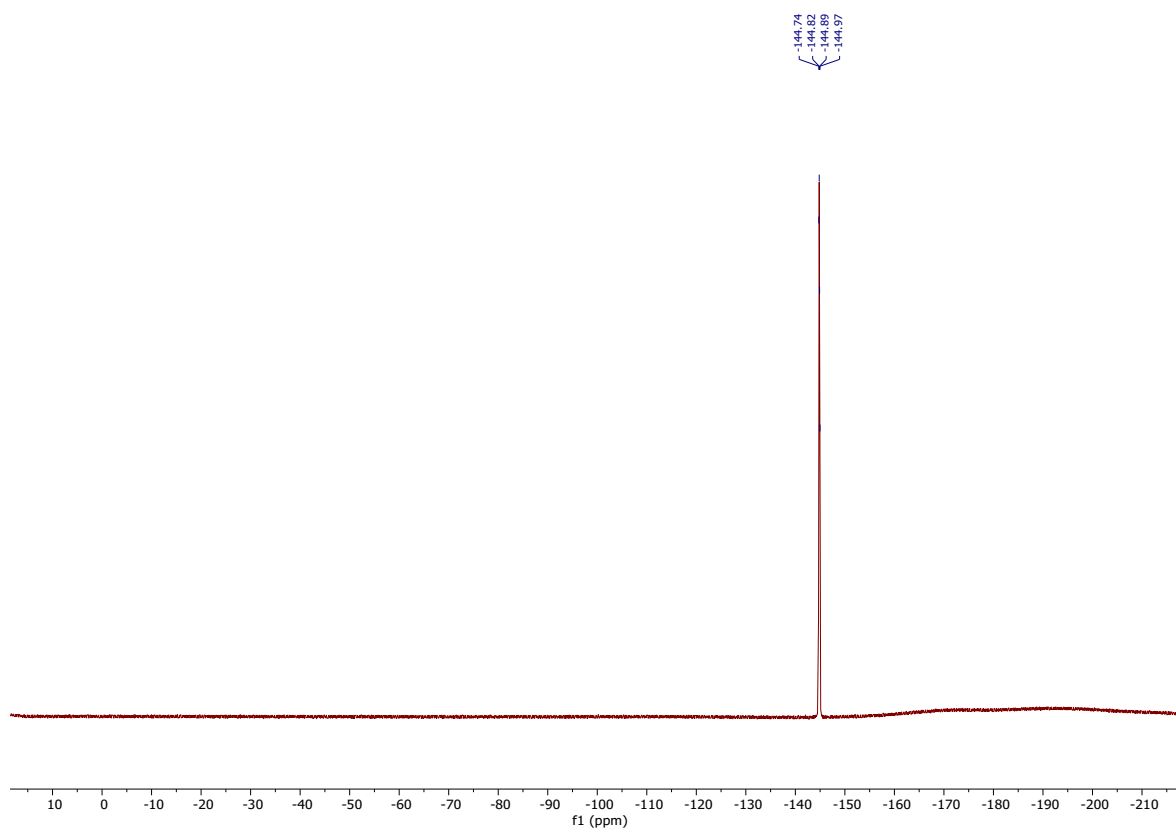

**Fig S14.**  $^{19}\text{F}$  NMR spectrum of **BODIPY-PM**.

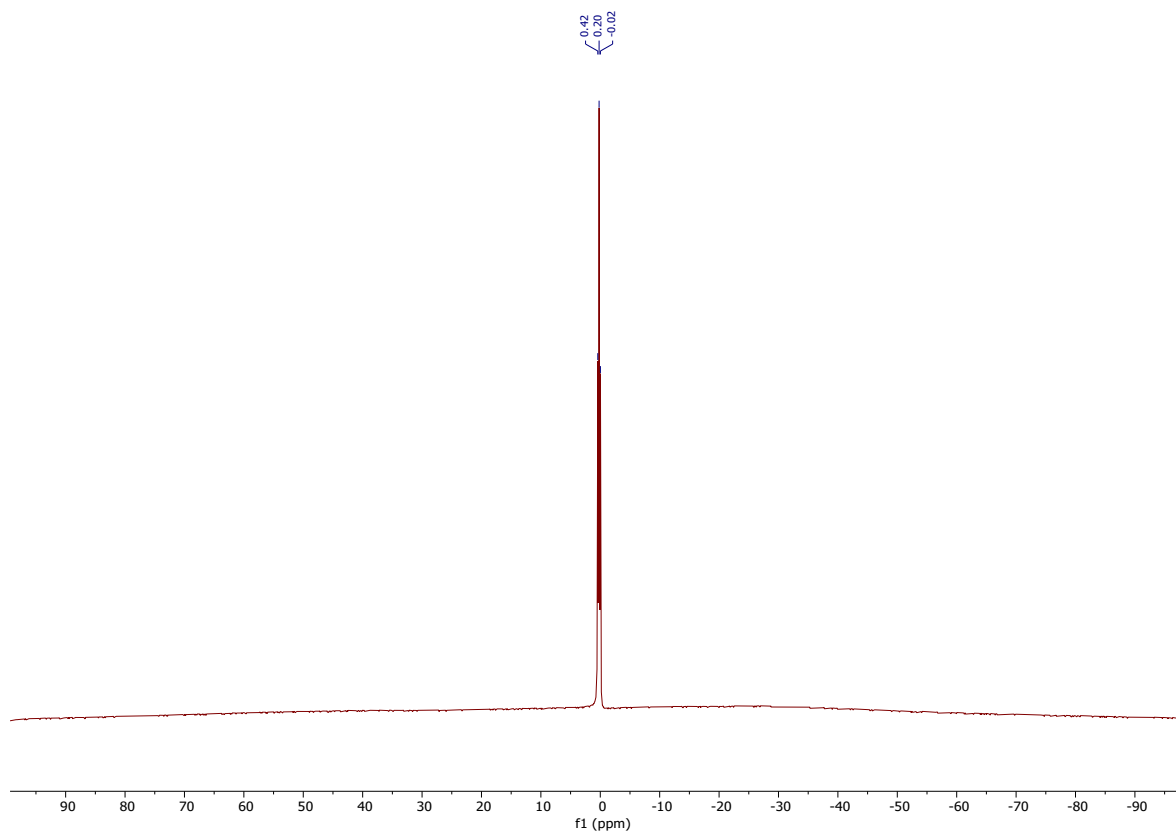

**Fig S15.**  $^{11}\text{B}$  NMR spectrum of **BODIPY-PM**.

## Mass Spectrometry (HPLC-MS) analysis

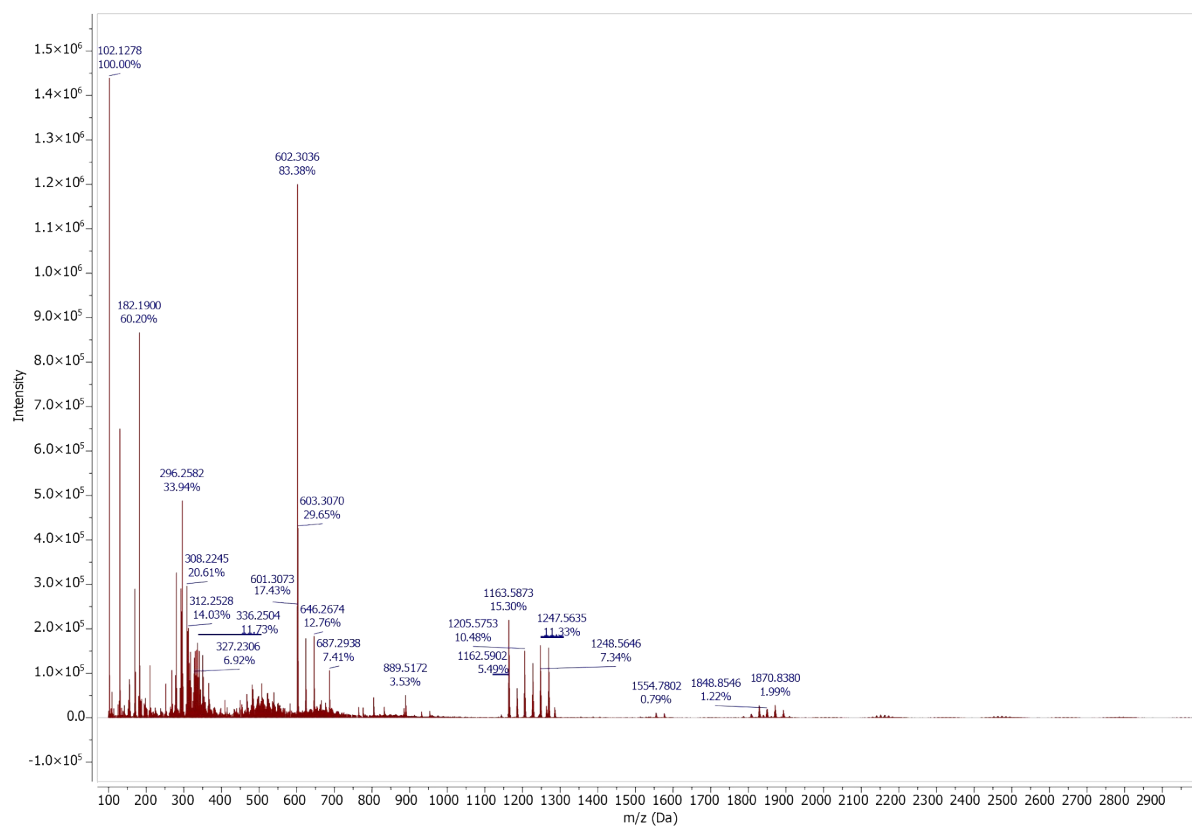

**Fig S16.** Mass spectrum of **BODIPY-PM**.

- [1] G. Matvey, C. Ulyana, B. Natalia, K. Arkadiy, Synthesis and Optical Properties of BODIPY with Active Group on meso- Position, *Lett. Org. Chem.* 13 (2017) 718–725. <https://doi.org/10.2174/1570178614666161118155955>.
- [2] J. Pliquett, S. Amor, M. Ponce-Vargas, M. Laly, C. Racoeur, Y. Rousselin, F. Denat, A. Bettaïeb, P. Fleurat-Lessard, C. Paul, C. Goze, E. Bodio, Design of a multifunctionalizable BODIPY platform for the facile elaboration of a large series of gold(i)-based optical theranostics, *Dalt. Trans.* 47 (2018) 11203–11218. <https://doi.org/10.1039/c8dt02364f>.
- [3] D.I. Danylchuk, S. Moon, K. Xu, A.S. Klymchenko, Switchable Solvatochromic Probes for Live-Cell Super-resolution Imaging of Plasma Membrane Organization, *Angew. Chemie Int. Ed.* 58 (2019) 14920–14924. <https://doi.org/10.1002/anie.201907690>.
